# Supplementary material for: Kinetic effects of cationic surfactants on the photocatalytic degradation of anionic dyes in aqueous TiO2 dispersions
Source: Royal Society of Chemistry journal article supplement (doi:10.1039/d2nj04715b), 2022-11-18

## Supplementary Information

### **Kinetic effects of cationic surfactants on the photocatalytic degradation of anionic dyes in aqueous TiO<sub>2</sub> dispersions**

Raimondo Germani<sup>a,b</sup>, Matteo Mancinelli<sup>a</sup>, Arianna Roselli<sup>a</sup>, Matteo Tiecco<sup>a</sup>, Simona Fantacci<sup>c</sup>,  
Tiziana Del Giacco<sup>a,b,\*</sup>

<sup>a</sup>*Dipartimento di Chimica, Biologia e Biotecnologie, Università di Perugia, Via Elce di Sotto 8,  
06123 Perugia, Italy*

<sup>b</sup>*Centro di Eccellenza Materiali Innovativi Nanostrutturati (CEMIN), Università di Perugia, Via  
Elce di Sotto 8, 06123 Perugia, Italy*

<sup>c</sup> *Computational Laboratory for Hybrid/Organic Photovoltaics (CLHYO) - Istituto CNR di Scienze e  
Tecnologie Chimiche "Giulio Natta" (CNR-SCITEC) c/o Dipartimento di Chimica, Biologia e  
Biotecnologie, Via Elce di Sotto 8, 06213, Perugia, Italy*

E-mail address: tiziana.delgiacco@unipg.it (T. Del Giacco)

## Table of Contents:

|                                                                                                                                                                                                                                                       |     |
|-------------------------------------------------------------------------------------------------------------------------------------------------------------------------------------------------------------------------------------------------------|-----|
| Fig. S1. Absorption spectra of OG recorded at different pH in aqueous solution.....                                                                                                                                                                   | S4  |
| Fig. S2. Absorption spectra of OG recorded in aqueous solution at pH 5.7 alone and in the presence of CTEABr, CTBABr and <i>p</i> -DoTABr.                                                                                                            | S4  |
| Fig. S3. Absorption spectra of OG recorded in aqueous solution at pH 12 alone and in the presence of various CTEABr concentrations.                                                                                                                   | S5  |
| Fig. S4. Absorption spectra recorded during the UV irradiation of OG in aqueous solution at pH 5.7 as a function of irradiation time.                                                                                                                 | S5  |
| Fig. S5. Absorption spectra recorded during the photodegradation of OG by TiO <sub>2</sub> in aqueous dispersion at pH 5.7 and in the presence of CTBABr as a function of irradiation time.                                                           | S6  |
| Fig. S6. Photodegradation kinetics of OG by TiO <sub>2</sub> in aqueous dispersion at pH 5.7 alone and in the presence of CTBABr, CTEABr and <i>p</i> -DoTABr in water.                                                                               | S6  |
| Fig. S7. Absorption spectra recorded during the photodegradation of OG catalyzed by TiO <sub>2</sub> in aqueous dispersion at pH 12 as a function of irradiation time.                                                                                | S7  |
| Fig. S8. Structures optimized in water of (a) OG(diazo), OG(hydrazon) and OG(-H <sup>+</sup> ) <sup>-</sup> ; (b) EY(-2H <sup>+</sup> ) <sup>2-</sup> , FLBr <sub>3</sub> (-2H <sup>+</sup> ) <sup>2-</sup> and FL(-2H <sup>+</sup> ) <sup>2-</sup> . | S7  |
| Fig. S9. Absorption spectra recorded during the photodegradation of OG by TiO <sub>2</sub> in aqueous dispersion at pH 12 and in the presence of CTEABr as a function of irradiation time.                                                            | S8  |
| Fig. S10. Photodegradation of OG catalyzed by TiO <sub>2</sub> in aqueous dispersion at pH 12 in the presence of CTEABr (1.0 × 10 <sup>-3</sup> M).                                                                                                   | S8  |
| Fig. S11. Absorption spectra of EY recorded in aqueous solution at pH 5.7, at pH 12 alone and in the presence of CTABr, CTEABr, CTBABr and <i>p</i> -DoTABr.                                                                                          | S9  |
| Fig. S12. Photodegradation of EY catalyzed by TiO <sub>2</sub> in aqueous dispersion at pH 12.                                                                                                                                                        | S9  |
| Fig. S13. Absorption spectra recorded during the photodegradation of EY by TiO <sub>2</sub> in aqueous dispersion at pH 12 in the presence of CTABr as a function of irradiation time.                                                                | S10 |
| Fig. S14. Photodegradation of EY catalyzed by TiO <sub>2</sub> in aqueous dispersion at pH 12 in the presence of CTABr.                                                                                                                               | S10 |
| Fig. S15. Absorption spectra recorded during the photodegradation of EY by TiO <sub>2</sub> in aqueous dispersion at pH 12 in the presence of <i>p</i> -DoTABr as a function of irradiation time.                                                     | S11 |
| Fig. S16. Photodegradation of EY catalyzed by TiO <sub>2</sub> in aqueous dispersion at pH 12 in the presence of <i>p</i> -DoTABr.                                                                                                                    | S11 |

- Fig. S17. Absorption spectra of FL ( $1.0 \times 10^{-5}$  M) recorded in 1:1 water:ethanol acid solution. S12**
- Fig. S18. Absorption spectra recorded during the photodegradation of EY by  $\text{TiO}_2$  in aqueous dispersion at pH 12 and in the presence of  $\text{CH}_3\text{OH}$  as a function of irradiation time. S12**
- Fig. S19. HPLC-HRMS analysis. S13**

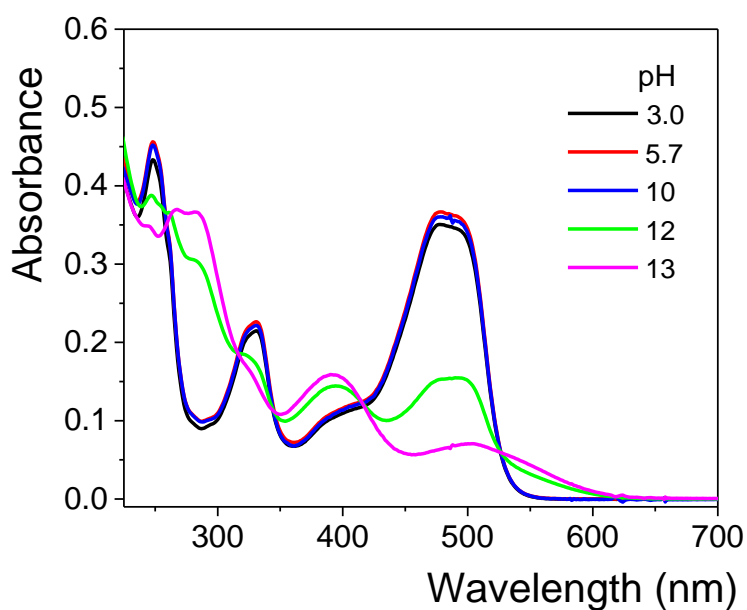

**Fig. S1.** Absorption spectra of OG ( $2.0 \times 10^{-5}$  M) recorded at different pH in aqueous solution.

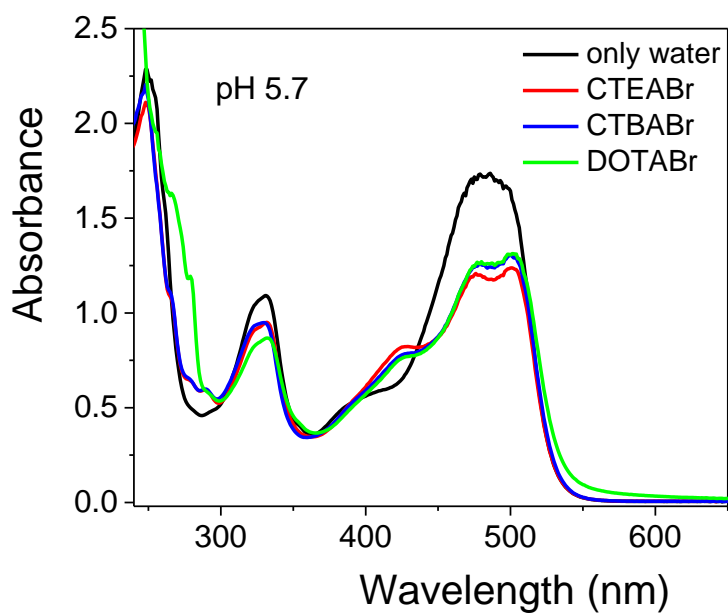

**Fig. S2.** Absorption spectra of OG ( $1.0 \times 10^{-4}$  M) recorded in aqueous solution at pH 5.7 alone (black line) and in the presence of  $1.0 \times 10^{-3}$  M CTEABr, CTBABr and *p*-DoTABr.

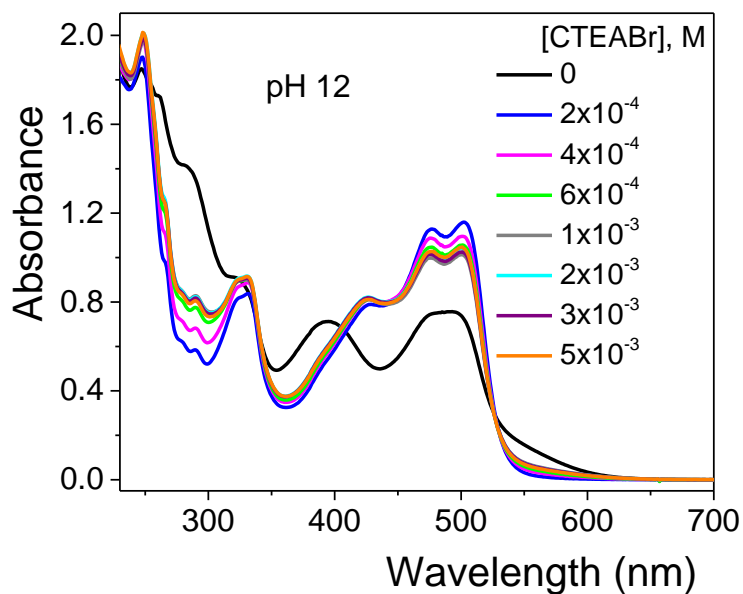

**Fig. S3.** Absorption spectra of OG ( $1.0 \times 10^{-4}$  M) recorded in aqueous solution at pH 12 alone (black line) and in the presence of various CTEABr concentrations ( $2.0 \times 10^{-4} \div 5.0 \times 10^{-3}$  M).

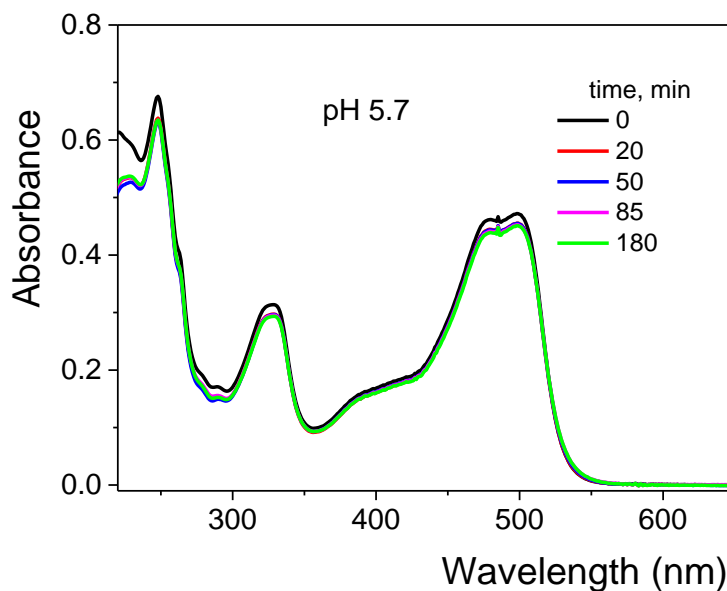

**Fig. S4.** Absorption spectra recorded during the UV irradiation of  $2.0 \times 10^{-4}$  M OG (analysis at  $2.5 \times 10^{-5}$  M after dilution with ethanol in acid solution) in aqueous solution at pH 5.7 as a function of irradiation time (12 UV lamps).

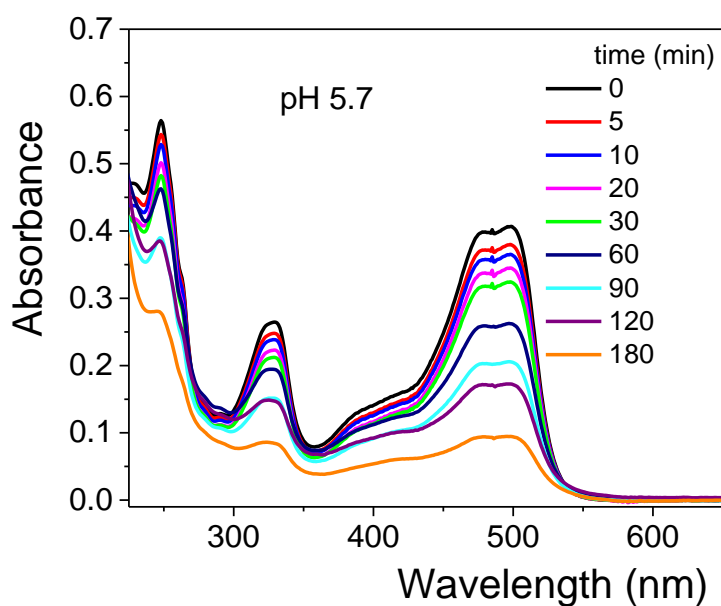

**Fig. S5.** Absorption spectra recorded during the photodegradation of  $2.0 \times 10^{-4}$  M OG (analysis at  $2.5 \times 10^{-5}$  M after dilution with ethanol in acid solution) by  $\text{TiO}_2$  (0.4 g/L) in aqueous dispersion at pH 5.7 and in the presence of CTBABr ( $1.0 \times 10^{-3}$  M) as a function of irradiation time (12 UV lamps).

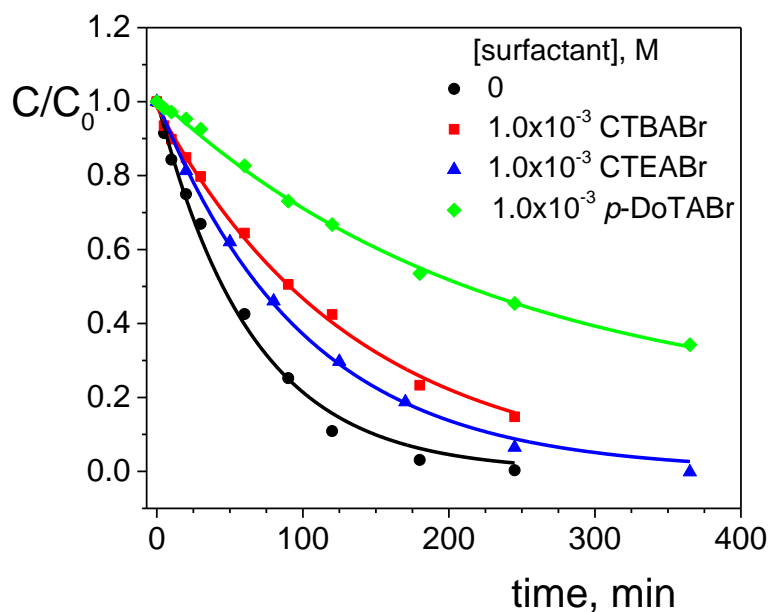

**Fig. S6.** Photodegradation kinetics of OG ( $2.0 \times 10^{-4}$  M) by  $\text{TiO}_2$  (0.4 g/L) in aqueous dispersion at pH 5.7 alone ( $\bullet$ ) and in the presence of  $1.0 \times 10^{-3}$  M CTBABr ( $\blacksquare$ ), CTEABr ( $\blacktriangle$ ) and *p*-DoTABr ( $\blacklozenge$ ) in water (12 UV lamps);  $\lambda_{\text{anal}} = 498$  nm. The solid lines represent the corresponding pseudo-first order kinetic fittings.

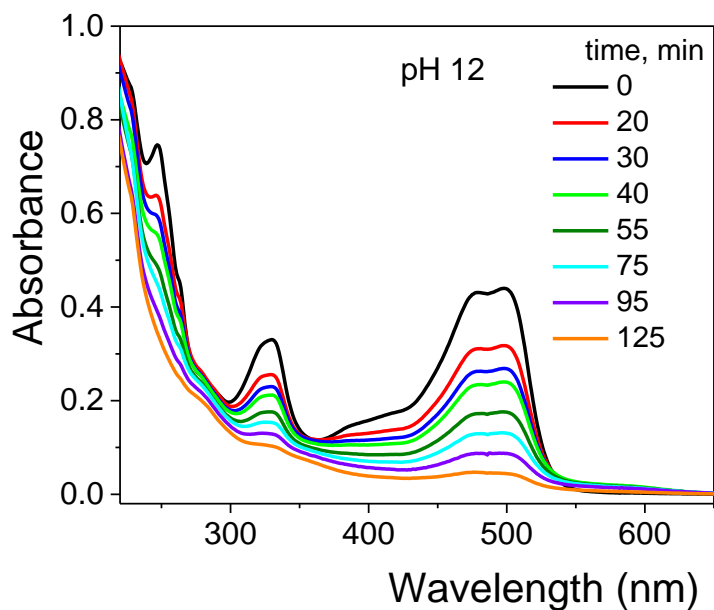

**Fig. S7.** Absorption spectra recorded during the photodegradation of  $2.0 \times 10^{-4}$  M OG (analysis at  $2.5 \times 10^{-5}$  M after dilution with ethanol in acid solution) catalyzed by  $\text{TiO}_2$  (0.4 g/L) in aqueous dispersion at pH 12 as a function of irradiation time (6 UV lamps).

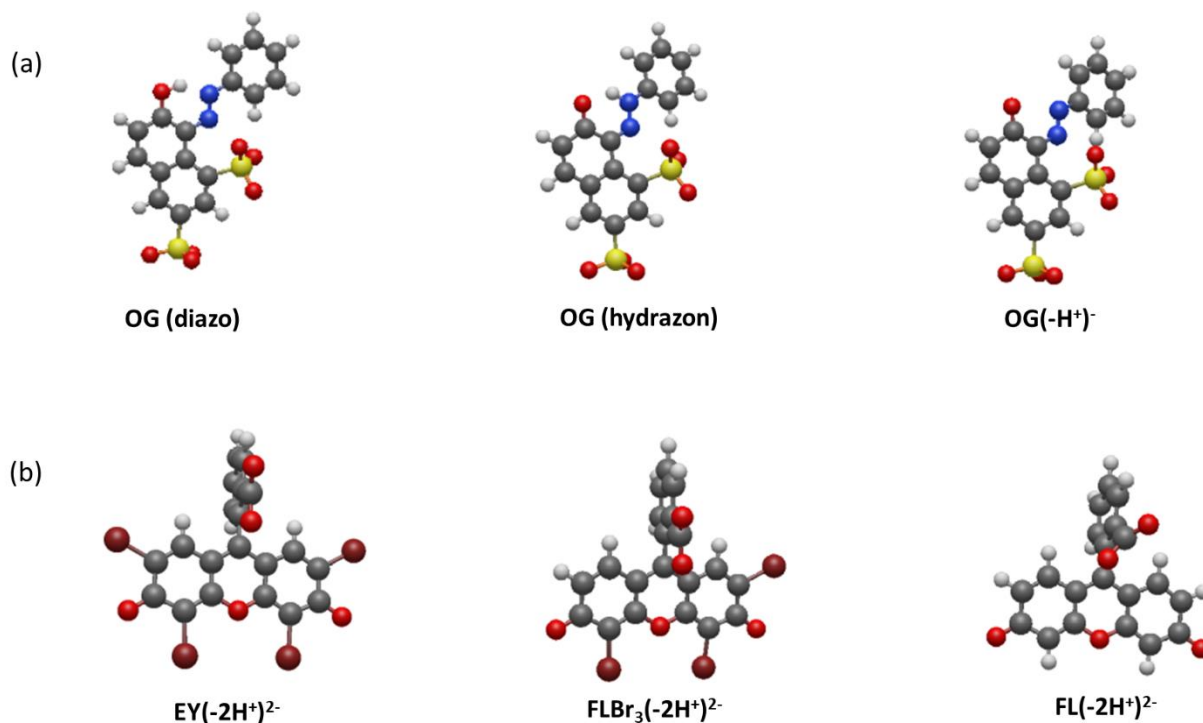

**Fig. S8.** Structures optimized in water of (a) OG(diazo), OG(hydrazon) and OG(-H<sup>+</sup>)<sup>-</sup>; (b) EY(-2H<sup>+</sup>)<sup>2-</sup>, FLBr<sub>3</sub>(-2H<sup>+</sup>)<sup>2-</sup> and FL(-2H<sup>+</sup>)<sup>2-</sup>.

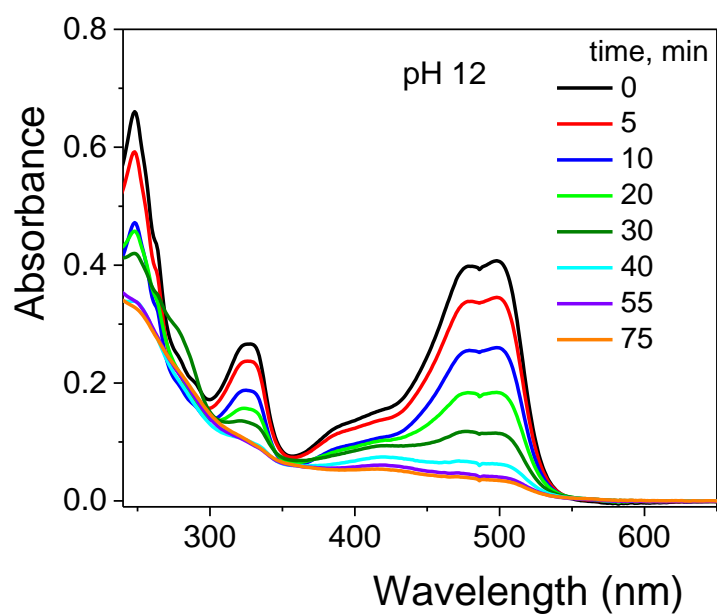

**Fig. S9.** Absorption spectra recorded during the photodegradation of  $2.0 \times 10^{-4}$  M OG (analysis at  $2.5 \times 10^{-5}$  M after dilution with ethanol in acid solution) by  $\text{TiO}_2$  (0.4 g/L) in aqueous dispersion at pH 12 and in the presence of CTEABr ( $1.0 \times 10^{-3}$  M) as a function of irradiation time (6 UV lamps).

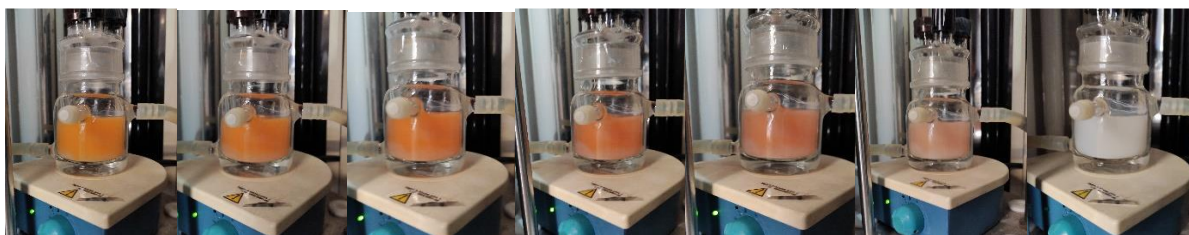

**Fig. S10.** Photodegradation of OG catalyzed by  $\text{TiO}_2$  in aqueous dispersion at pH 12 in the presence of CTEABr ( $1.0 \times 10^{-3}$  M).



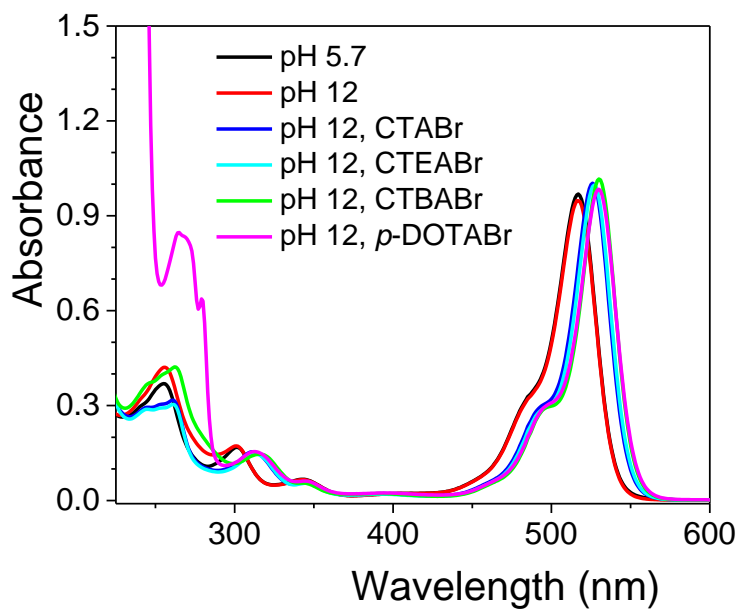

**Fig. S11.** Absorption spectra of EY ( $1.0 \times 10^{-5}$  M) recorded in aqueous solution at pH 5.7, at pH 12 alone and in the presence of  $1.0 \times 10^{-3}$  M CTABr, CTEABr, CTBABr and *p*-DoTABr.

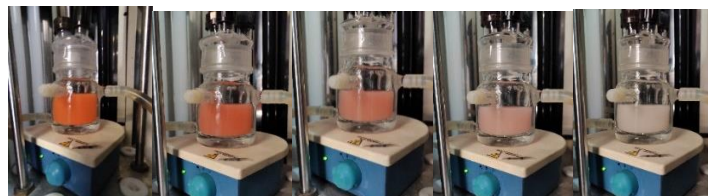

**Fig. S12.** Photodegradation of EY catalyzed by TiO<sub>2</sub> in aqueous dispersion at pH 12.

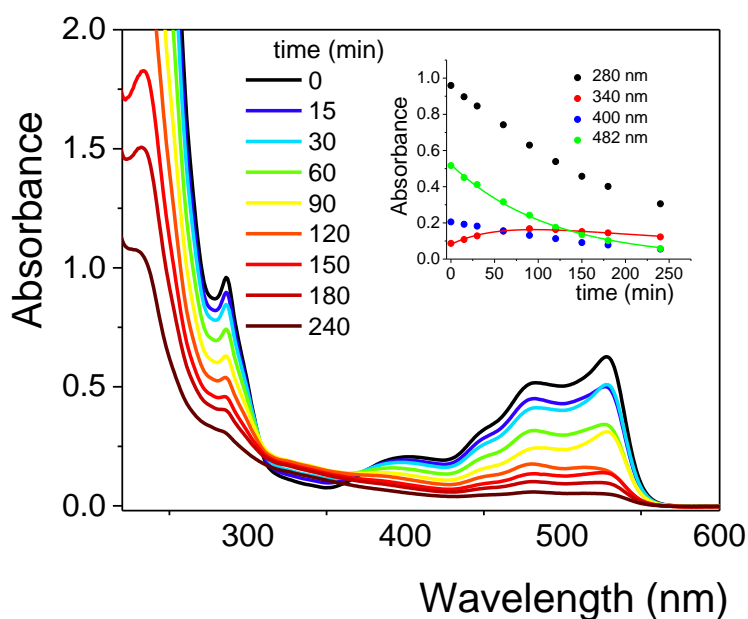

**Fig. S13.** Absorption spectra recorded during the photodegradation of  $2.0 \times 10^{-4}$  M EY (analysis at  $1.0 \times 10^{-4}$  M after dilution with ethanol in acid solution) by  $\text{TiO}_2$  (0.4 g/L) in aqueous dispersion at pH 12 in the presence of CTABr ( $1.0 \times 10^{-3}$  M) as a function of irradiation time (12 UV lamps). Inset: change in absorbance at 280, 340, 400 and 482 nm as a function of irradiation time. The solid lines represent the corresponding kinetics fittings.

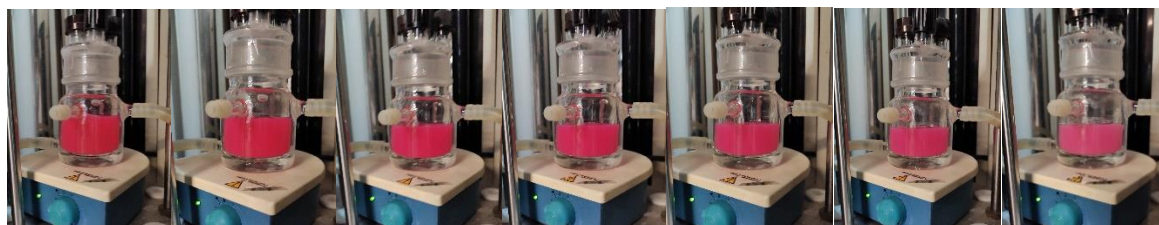

**Fig. S14.** Photodegradation of EY catalyzed by  $\text{TiO}_2$  in aqueous dispersion at pH 12 in the presence of CTABr ( $1.0 \times 10^{-3}$  M).

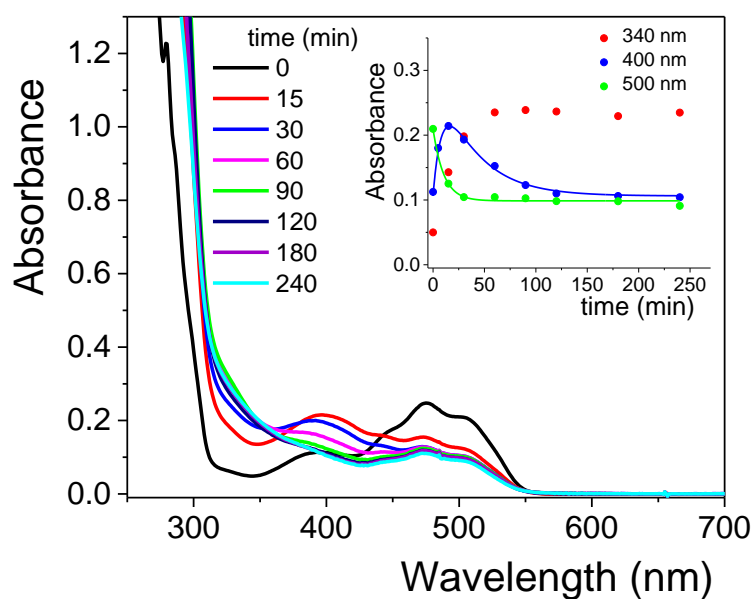

**Fig. S15.** Absorption spectra recorded during the photodegradation of  $2.0 \times 10^{-4}$  M EY (analysis at  $1.0 \times 10^{-4}$  M after dilution with  $\text{CH}_3\text{CN}$  in acid solution) by  $\text{TiO}_2$  (0.4 g/L) in aqueous dispersion at pH 12 in the presence of *p*-DoTABr ( $1.0 \times 10^{-3}$  M) as a function of irradiation time (12 UV lamps). Inset: change in absorbance at 340, 400 and 500 nm as a function of irradiation time. The solid lines represent the corresponding kinetics fittings.

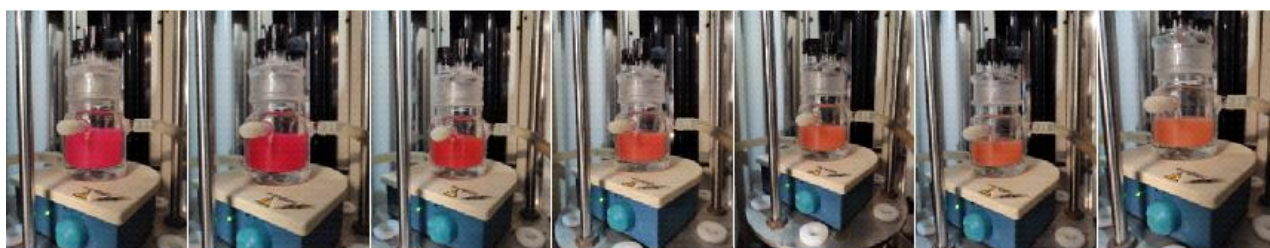

**Fig. S16.** Photodegradation of EY catalyzed by  $\text{TiO}_2$  in aqueous dispersion at pH 12 in the presence of *p*-DoTABr ( $1.0 \times 10^{-3}$  M).

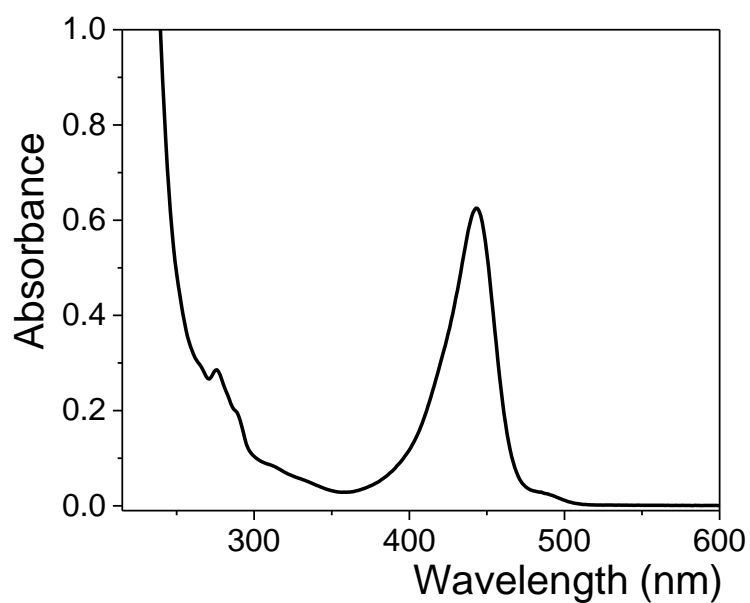

**Fig. S17.** Absorption spectra of FL ( $1.0 \times 10^{-5}$  M) recorded in 1:1 water:ethanol acid solution.

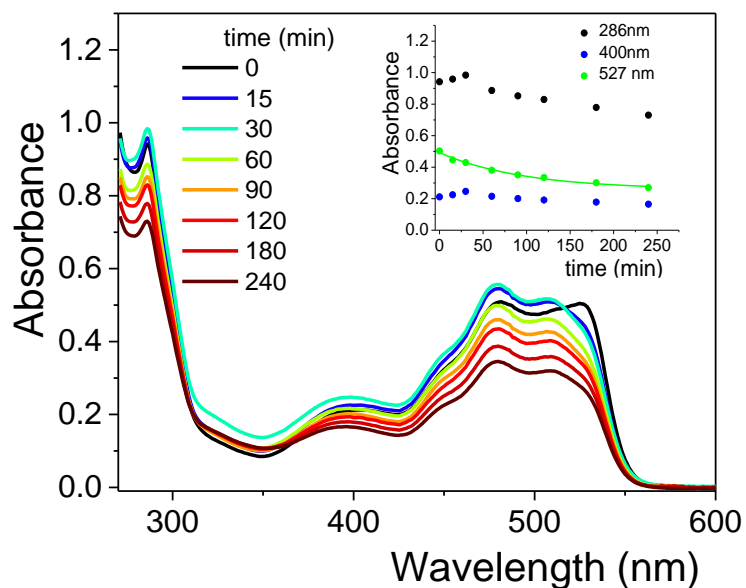

**Fig. S18.** Absorption spectra recorded during the photodegradation of  $2.0 \times 10^{-4}$  M EY (analysis at  $1.0 \times 10^{-4}$  M after dilution with ethanol in acid solution) by  $\text{TiO}_2$  (0.4 g/L) in aqueous dispersion at pH 12 and in the presence of  $\text{CH}_3\text{OH}$  (1.0 M) as a function of irradiation time (12 UV lamps). Inset: change in absorbance at 286, 400 and 527 nm as a function of irradiation time. The solid lines represent the corresponding kinetics fittings.

**Fig. S19.** HPLC-HRMS analysis

MS spectrum:

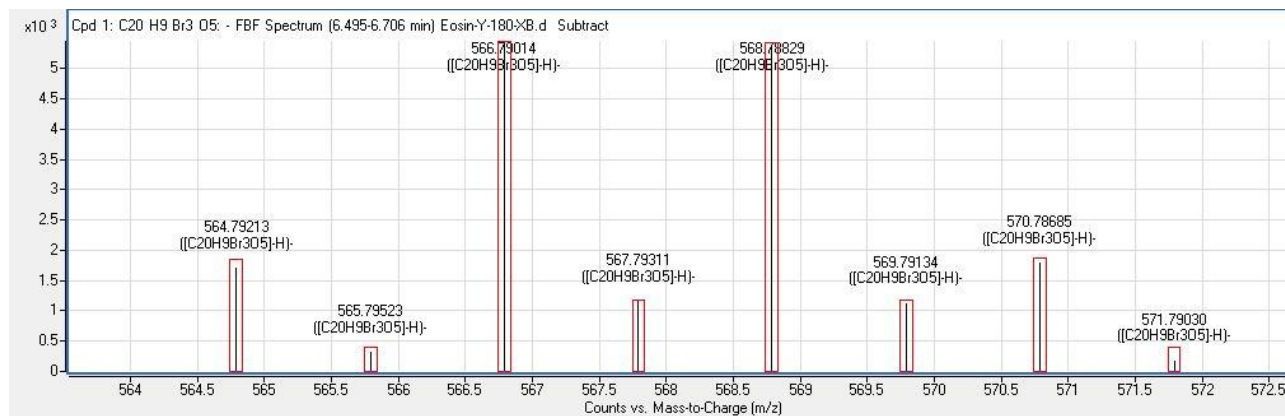

UV-Vis spectrum:

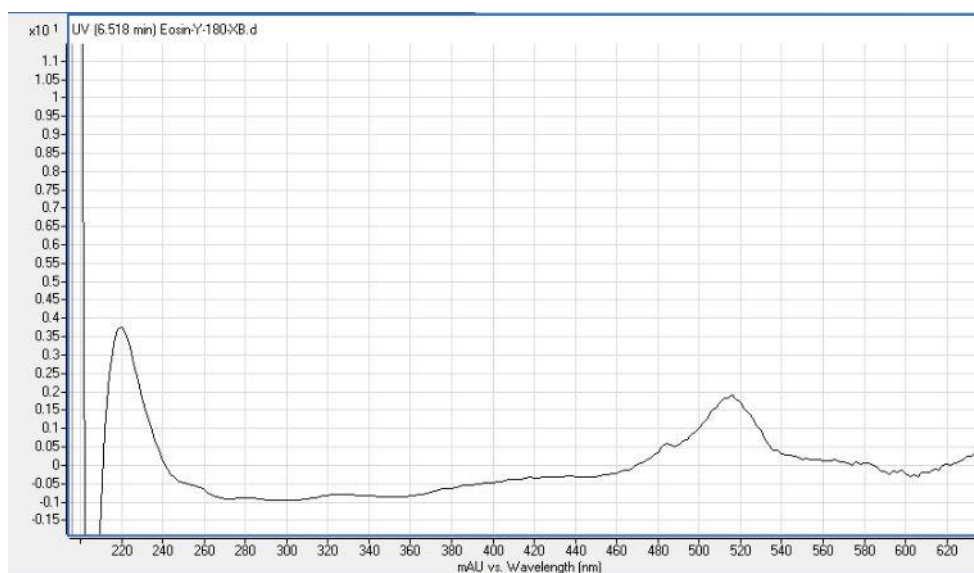

Supplement: d2nj04715b1.pdf [file d2nj04715b1.pdf]
